# Supplementary material
Source: Springer Nature journal article supplement (https://www.springermedizin.de/resource/supplementary/12245_2010_36_MOESM2_ESM.pdf/9672636)

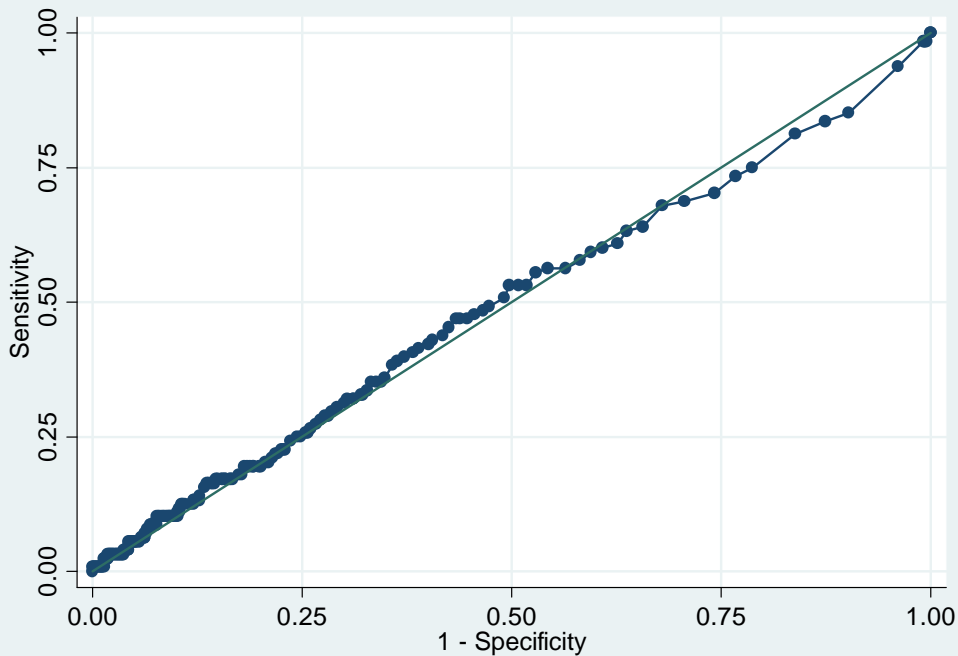

Area under ROC curve = 0.4969

Supplement: MOESM2 [file 9672636]
